# Supplementary material for: A simple strategy for the creation of a recombinant lectin microarray
Source: Royal Society of Chemistry journal article supplement (doi:10.1039/b800725j), 2008-04-14
Supplement: b800725j.pdf [file b800725j.pdf]

**Supplemental Materials for:**

A simple strategy for the creation of a recombinant lectin microarray

Ku-Lung Hsu, Jeffrey C. Gildersleeve and Lara K. Mahal<sup>\*</sup>

## Supplemental Tables

**Table S1:** Primers Used for Cloning.

| Lectin  | Forward primer                                                         | Reverse primer                                                                  |
|---------|------------------------------------------------------------------------|---------------------------------------------------------------------------------|
| GafD    | 5' GAC GAC GAC AAG ATG<br>GTT TCA TTT ATT GGC<br>AGT ACG GAG 3'        | 5' GAG GAG AAG CCC GGT TTA<br>TGT TAC TGT GTC ATT CAG<br>CGT AAA TGG 3'         |
| PA-IL   | 5' GAC GAC GAC AAG ATG<br>GCT TGG AAA GGT GAG<br>GTT C 3'              | 5' GAG GAG AAG CCC GGT TCA<br>GGA CTG ATC CTT TCC AAT<br>ATT GAC 3'             |
| PA-IIL  | 5' GAC GAC GAC AAG ATG<br>GCA ACA CAA GGA GTG<br>TTC ACC 3'            | 5' GAG GAG AAG CCC GGT CTA<br>GCC GAG CGG CCA GTT GAT<br>3'                     |
| PapGII  | 5' GAC GAC GAC AAG ATG<br>TGG AAT AAT ATT GTC<br>TTT TAC TCC CTT GG 3' | 5' GAG GAG AAG CCC GGT TTA<br>TCC GCC GAT ATT CTT AAA<br>TAA GAA TAA CAT TTC 3' |
| PapGIII | 5' GAC GAC GAC AAG ATG<br>GCA AAC CAG AGT ACA<br>ATG TTT TAC 3'        | 5' GAG GAG AAG CCC GGT TCA<br>TCC TCC GGT ATT TTT AAT<br>TGA G 3'               |
| RS-IIL  | 5' GAC GAC GAC AAG ATG<br>GCT CAG CAA GGT GTA<br>TTC 3'                | 5' GAG GAG AAG CCC GGT TCA<br>GCC CAG CGG CCA GTT 3'                            |
| GafD-m  | 5' GAC GAC GAC AAG ATG<br>GTT TCA TTT ATT GGC<br>AGT ACG GAG 3'        | 5' GAG GAG AAG CCC GGT TTA<br>TGT TAC TGT GTC ATT CAG<br>CGT AAA TGG 3'         |

**Table S2:** List of Components on the Array and Abbreviations

| <b>Group</b>    | <b>Abbreviation</b>                                                                     | <b>Description</b>                                                                                        |
|-----------------|-----------------------------------------------------------------------------------------|-----------------------------------------------------------------------------------------------------------|
| Defined Sugars  | 3'SLacNAc                                                                               | Sialyl $\alpha$ 2-3Gal $\beta$ 1-4GlcNAc – BSA (3'SLacNAc)                                                |
|                 | 6'SLac                                                                                  | Sialyl $\alpha$ 2-3Gal $\beta$ 1-4Glc-APD-HSA (6'SLac)                                                    |
|                 | Adi                                                                                     | GalNAc $\alpha$ 1-3Gal $\beta$ -BSA (Adi)                                                                 |
|                 | alphaGal                                                                                | Gal $\alpha$ 1-3Gal $\beta$ 1-4GlcNAc-BSA (aGal)                                                          |
|                 | Ara5                                                                                    | Ara $\alpha$ 1-5Ara $\alpha$ 1-5Ara $\alpha$ 1-5Ara $\alpha$ 1-5Ara $\alpha$ 1-BSA (Ara5)                 |
|                 | Bdi                                                                                     | Gal $\alpha$ 1-3Gal– BSA (Bdi)                                                                            |
|                 | BG-A                                                                                    | GalNAc $\alpha$ 1-3(Fuca1-2)Gal $\beta$ - BSA [BG-A]                                                      |
|                 | BG-A1                                                                                   | GalNAc $\alpha$ 1-3(Fuca1-2)Gal $\beta$ 1-3GlcNAc $\beta$ 1-3Gal $\beta$ 1-4(Glc)-APD-HSA (BG-A1)         |
|                 | BG-B                                                                                    | Gal $\alpha$ 1-3(Fuca1-2)Gal $\beta$ -BSA [BG-B] from EMD                                                 |
|                 | BG-B (Dextra)                                                                           | Gal $\alpha$ 1-3(Fuca1-2)Gal $\beta$ -BSA [BG-B] from Dextra                                              |
|                 | BG-H1                                                                                   | Fuca1-2Gal $\beta$ 1-3GlcNAc $\beta$ 1-3Gal $\beta$ 1-4Glc $\beta$ –APD-HSA [BG-H1]                       |
|                 | BG-H2                                                                                   | Fuca1-2Gal $\beta$ 1-4GlcNAc $\beta$ -HSA (BG-H2)                                                         |
|                 | Cellobiose                                                                              | Glc $\beta$ 1-4Glc $\beta$ 1-4Glc $\beta$ -BSA (Cello3)                                                   |
|                 | Cellotriose                                                                             | Glc $\beta$ 1-4Glc $\beta$ -BSA (Cellotriose)                                                             |
|                 | Chito 3                                                                                 | GlcNAc $\beta$ 1-4GlcNAc $\beta$ 1-4GlcNAc $\beta$ -BSA (Chito 3)                                         |
|                 | DSLNT                                                                                   | Sia $\alpha$ 2-3Gal $\beta$ 1-3(Sia $\alpha$ 2-6)GlcNAc $\beta$ 1-3Gal $\beta$ 1-BSA (DSLNT)              |
|                 | Fuc-a                                                                                   | Fuc- $\alpha$ - BSA                                                                                       |
|                 | Fuc-b                                                                                   | Fuc- $\beta$ - BSA                                                                                        |
|                 | G2M4                                                                                    | Man $\beta$ 1-4(Gal $\alpha$ 1-6)Man $\beta$ 1-4(Gal $\alpha$ 1-6)Man $\beta$ 1-4Man $\beta$ 1-BSA (G2M4) |
|                 | GA1                                                                                     | Gal $\beta$ 1-3GalNAc $\beta$ 1-4Gal $\beta$ 1-BSA (GA1tri or asialo-GM1)                                 |
|                 | GA2di                                                                                   | GalNAc $\beta$ 1-4Gal $\beta$ - BSA (GA2di)                                                               |
|                 | Gal3                                                                                    | Gal $\alpha$ 1-3Gal $\beta$ 1-4Gal $\alpha$ -BSA (Gal3)                                                   |
|                 | Gal-a                                                                                   | Gal- $\alpha$ - BSA                                                                                       |
|                 | Gala1-4Galb                                                                             | Gal $\alpha$ 1-4Gal $\beta$ -CETE-BSA                                                                     |
|                 | Gal-b                                                                                   | Gal- $\beta$ - BSA                                                                                        |
|                 | Galb1-6Man-a                                                                            | Gal $\beta$ 1-6Man- $\alpha$ - BSA                                                                        |
|                 | GalNAc-a                                                                                | GalNAc- $\alpha$ - BSA                                                                                    |
|                 | GalNAca1-6Galb                                                                          | GalNAc $\alpha$ 1-6Gal $\beta$ -BSA                                                                       |
|                 | GalNAc-b                                                                                | GalNAc- $\beta$ - BSA                                                                                     |
|                 | Gb4                                                                                     | GalNAc $\beta$ 1-3Gal $\alpha$ 1-4Gal $\beta$ 1-BSA (Gb4)                                                 |
|                 | Glc-a                                                                                   | Glc- $\alpha$ - BSA                                                                                       |
|                 | Glca1-6Glca1-4Glca1-4Glcb                                                               | Glc $\alpha$ 1-6Glc $\alpha$ 1-4Glc $\alpha$ 1-4Glc $\beta$ -CETE-BSA                                     |
|                 | Glc-b                                                                                   | Glc- $\beta$ - BSA                                                                                        |
|                 | GlcNAca1-4Galb                                                                          | GlcNAc $\alpha$ 1-4Gal $\beta$ -BSA                                                                       |
|                 | GlcNAc-b                                                                                | GlcNAc- $\beta$ - BSA                                                                                     |
|                 | GM1                                                                                     | Gal $\beta$ 1-3GalNAc $\beta$ 1-4(Sia $\alpha$ 2-3)Gal $\beta$ -4Glc-HSA (GM1)                            |
| GM3             | Sialyl $\alpha$ 2-3Gal $\beta$ 1-4Glc-APD-HSA (GM3 )                                    |                                                                                                           |
| Isomaltose      | Glc $\alpha$ 1-6Glc $\beta$ -BSA (Isomalt)                                              |                                                                                                           |
| LacNAc          | Gal $\beta$ 1-4Glc $\beta$ – BSA (Lac)                                                  |                                                                                                           |
| Lactose         | Gal $\beta$ 1-4GlcNAc – BSA (LacNAc,)                                                   |                                                                                                           |
| LeA             | Gal $\beta$ 1-3[Fuca1-4]GlcNAc $\beta$ 1-3Gal $\beta$ 1-4Glc $\beta$ - BSA (Lea )       |                                                                                                           |
| LeB             | Fuca1-2Gal $\beta$ 1-3[Fuca1-4]GlcNAc $\beta$ 1-3Gal $\beta$ 1-4Glc $\beta$ -BSA (Leb ) |                                                                                                           |
| LeC             | Gal $\beta$ 1-3GlcNAc $\beta$ – BSA (LeC)                                               |                                                                                                           |
| LeX (dimeric)   | Di-LeX-APE-BSA                                                                          |                                                                                                           |
| LeX (monomeric) | Gal $\beta$ 1-4[Fuca1-3]GlcNAc-APD-HSA (Lex)                                            |                                                                                                           |
| LeY             | Fuca1-2Gal $\beta$ 1-4[Fuca1-3]GlcNAc –HSA (Ley)                                        |                                                                                                           |

|               |                                                                                                           |
|---------------|-----------------------------------------------------------------------------------------------------------|
| LNnT          | Galβ1-4GlcNAcβ1-3Galβ1-BSA (LNnT)                                                                         |
| LNT           | Galβ1-3GlcNAcβ1-3Galβ-BSA (LNT)                                                                           |
| LSTa          | Siaα2-3Galβ1-3GlcNAcβ1-3Galβ1-BSA (LSTa)                                                                  |
| LSTb          | Galβ1-3(Siaα2-6)GlcNAcβ1-3Galβ1-BSA (LSTb)                                                                |
| LSTc          | Siaα2-6Galβ1-3GlcNAcβ1-3Galβ1-BSA (LSTc)                                                                  |
| Maltohexaose  | Glcα1-4Glcα1-4Glcα1-4Glcα1-4Glcα-BSA (Malto5)                                                             |
| Maltose       | Glcα1-4Glcβ-BSA (Maltose)                                                                                 |
| Man3          | Manα1-6(Manα1-3)Manβ1-4GlcNAc -BSA (Man3)                                                                 |
| Man5          | Manα1-6(Manα1-3)Manα1-6(Manα1-3)Manβ1-4GlcNAc-BSA (Man5)                                                  |
| Man6          | Manα1-6(Manα1-3)Manα1-6(Manα1-2Manα1-3)Manβ1-4GlcNAc-BSA (Man6)                                           |
| Man7D1        | Manα1-2Manα1-6(Manα1-3)Manα1-6(Manα1-2Manα1-3)Manβ1-4GlcNAc-BSA (Man7D1)                                  |
| Man7D3        | Manα1-6(Manα1-3)Manα1-6(Manα1-2Manα1-2Manα1-3)Manβ1-4GlcNAc-BSA (Man7D3)                                  |
| Man8D1D3      | Manα1-2Manα1-6(Manα1-3)Manα1-6(Manα1-2Manα1-2Manα1-3)Manβ1-4GlcNAc-BSA (Man8D1D3)                         |
| Man9          | Manα1-2Manα1-6(Manα1-2Manα1-3)Manα1-6(Manα1-2Manα1-2Manα1-3)Manβ1-4GlcNAc-BSA Man9                        |
| Man-a         | Man-α - BSA                                                                                               |
| Manα1-6Man-a  | Manα1-6Man-α - BSA                                                                                        |
| Manb4         | Manβ1-4Manβ1-4Manβ1-4Manβ1-BSA (Manβ4)                                                                    |
| ManT          | Manα1-6[Manα1-3]Manβ -BSA [ManT]                                                                          |
| P1            | Galα1-4Galβ1-4GlcNAc-BSA (P1,)                                                                            |
| Pk or Gb3     | Galα1-4Galβ1-4Glc-HSA [Pk or Gb3]                                                                         |
| pLNH          | Galβ1-3GlcNAcβ1-3Galβ1-4GlcNAcβ1-3Galβ1-BSA (pLNH)                                                        |
| Rha-a         | Rha-α - BSA                                                                                               |
| Rha-b         | Rha-β - BSA                                                                                               |
| Sialyl LeA    | Siaα-LeA-APD-HSA (SLeA)                                                                                   |
| Sialyl LeX    | Sialylα2-3Galβ1-4[Fucα1-3]GlcNAc - BSA                                                                    |
| SSSG          | SSSG-BSA                                                                                                  |
| STnS          | SerTnSerGly-BSA (STnS)                                                                                    |
| TFdi          | Galβ1-3GalNAcβ - HSA (GA1di)                                                                              |
| Tn            | GalNAcα1-Thr-Gly-Hex                                                                                      |
| Tn3           | AcTn-Tn-Tn-Gly-Hex-BSA (Tn3)                                                                              |
| X3Glc3        | Xylα1-6Glcβ1-4(Xylα1-6)Glcβ1-4(Xylα1-6)Glcβ1-BSA (X3Glc3)                                                 |
| Xylb4         | Xylβ1-4Xylβ1-4Xylβ1-4Xylβ1-BSA (Xylβ4)                                                                    |
| Glycoproteins | AGE30<br>Advanced glycation endproducts produced from Glc + BSA after 30 days (AGE30)                     |
|               | AGE60<br>Advanced glycation endproducts produced from Glc + BSA after 60 days (AGE60)                     |
|               | AGE90<br>Advanced glycation endproducts produced from Glc + BSA after 90 days (AGE90)                     |
|               | Alpha-1-acid glycoprotein<br>alpha1 Acid Glycoprotein                                                     |
|               | Alpha-fetoprotein<br>alpha fetoprotein                                                                    |
|               | Asialo-BSM<br>Asialo-Bovine submaxillary mucin (aBSM, Tn, TF, GlcNAcβ1-3GalNAc)                           |
|               | Asialo-fetuin<br>asialofetuin                                                                             |
|               | Asialo-glycophorin<br>asialo-glycophorin (aGn)                                                            |
|               | Asialo-OSM<br>asialo-Ovine submaxillary mucin (aOSM)                                                      |
|               | Asialo-OSM (enzyme treated)<br>enzyme treated asialo-Ovine submaxillary mucin (almost all Tn)             |
|               | BSM<br>Bovine submaxillary mucin (STn, STF, S-GlcNAcβ1-3, ~20% of sialic acid is acetylated at 7,8, or 9) |
|               | BSM (deacetylated)<br>Deacetylated-Bovine submaxillary mucin (deAcBSM)                                    |
|               | CEA<br>carcinoembryonic antigen (CEA)                                                                     |
|               | FABP<br>Fatty Acid Binding Protein (FABP)                                                                 |
|               | Fetuin<br>fetuin                                                                                          |
|               | Glycophorin<br>Glycophorin (Gn)                                                                           |
|               | hsp90<br>Heat Shock Protein 90 (hsp90)                                                                    |
|               | KLH<br>Keyhole limpet hemocyanin                                                                          |

|          |                      |                                                                            |
|----------|----------------------|----------------------------------------------------------------------------|
|          | KLH (oxidized)       | periodate oxidized Keyhole limpet hemocyanin                               |
|          | OSM                  | Ovine submaxillary mucin (94% STn, 4% TF, 2% Fuca1-2Gal $\beta$ 1-3GalNAc) |
|          | OSM (enzyme treated) | enzyme treated Ovine submaxillary mucin (almost all STn)                   |
|          | Ovalbumin            | ovalbumin                                                                  |
|          | PSA                  | Prostate Specific Antigen (PSA)                                            |
|          | Tgl                  | Thyroglobulin (Tgl)                                                        |
| Controls | BSA                  | Bovine serum albumin                                                       |
|          | HSA                  | Human serum albumin (isolated from serum)                                  |
|          | rHSA                 | Human serum albumin (recombinant)                                          |
|          | Cy3                  | Cy3-labeled BSA                                                            |
|          | Cy5                  | Cy5-labeled BSA                                                            |

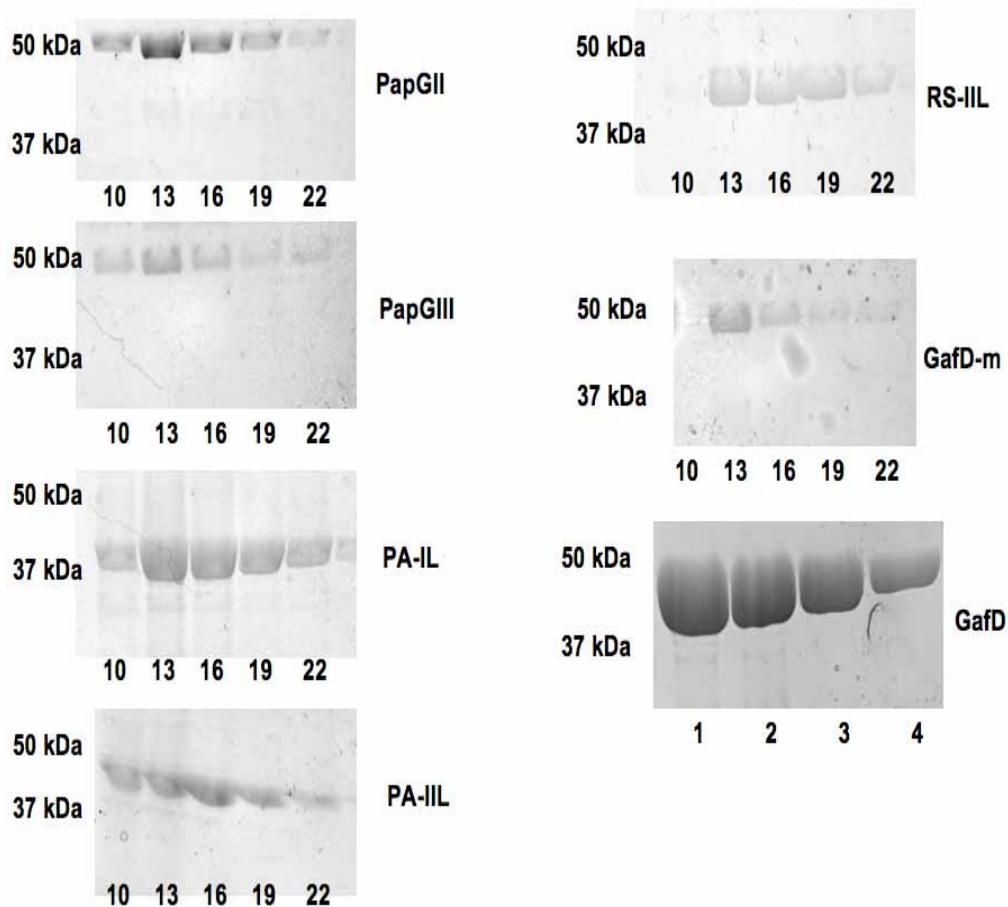

**Figure S1** Expression of the recombinant lectin panel. 10% SDS-PAGE stained with Coomassie Blue showing the elution fractions collected during purification as described in the Experimental section.

A.

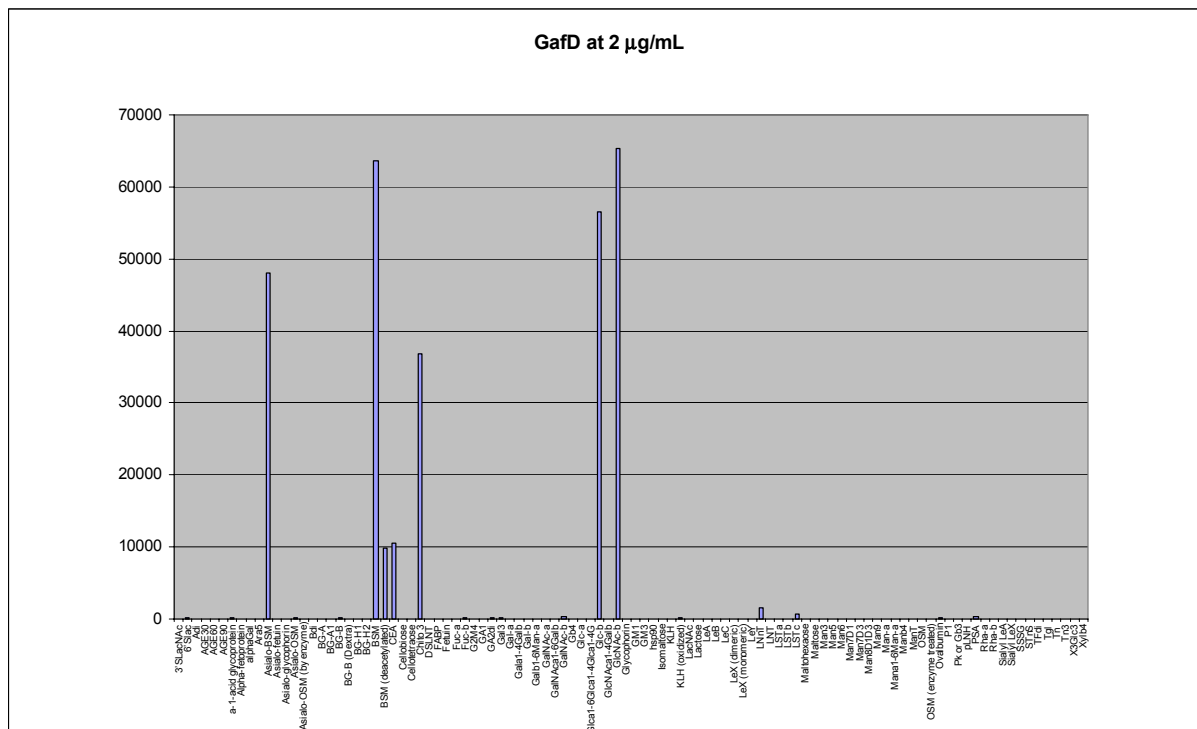

B.

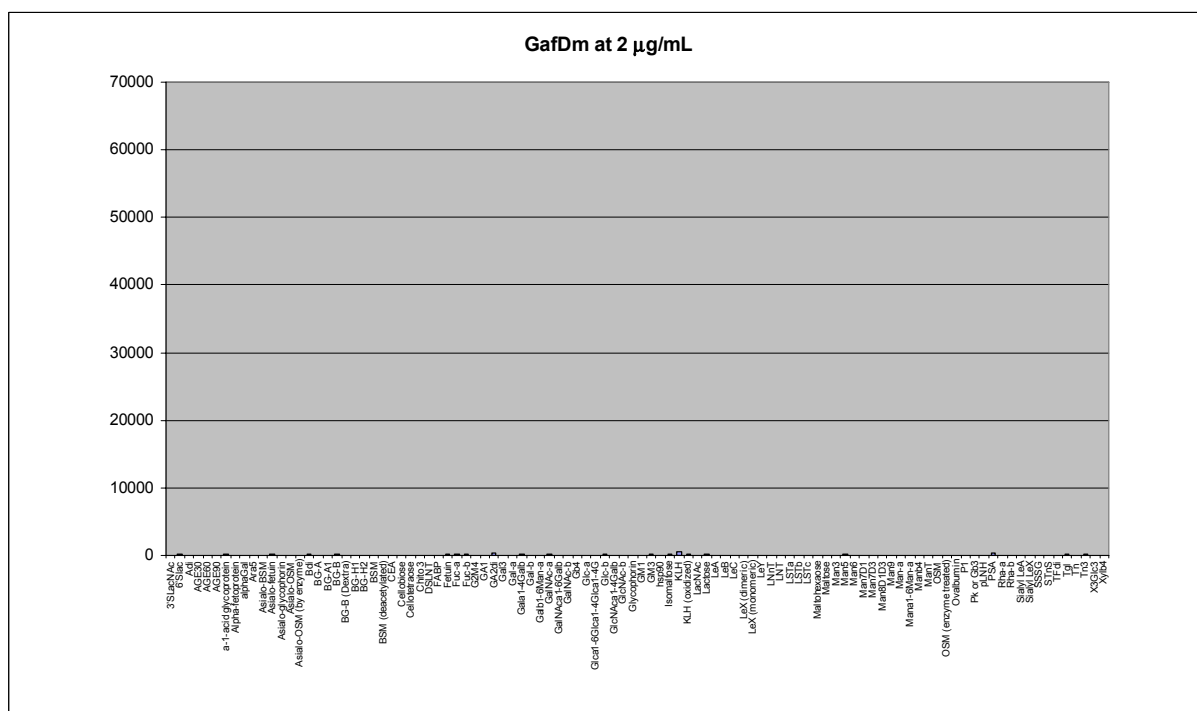

C.

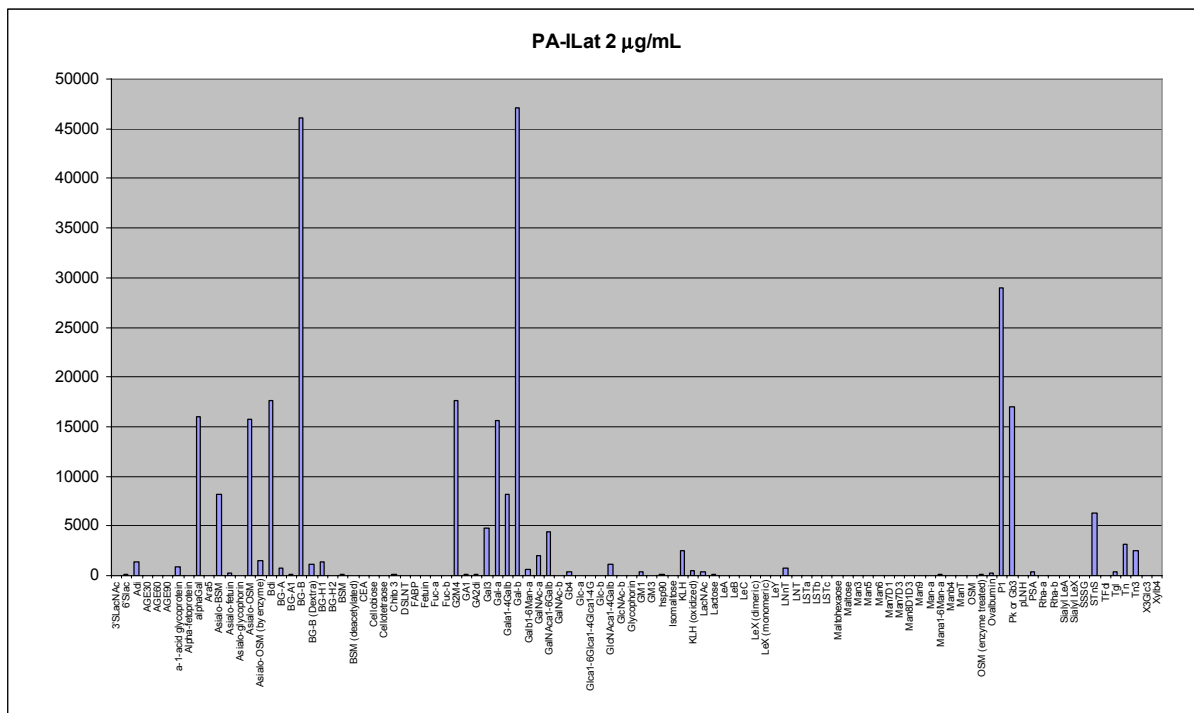

D.

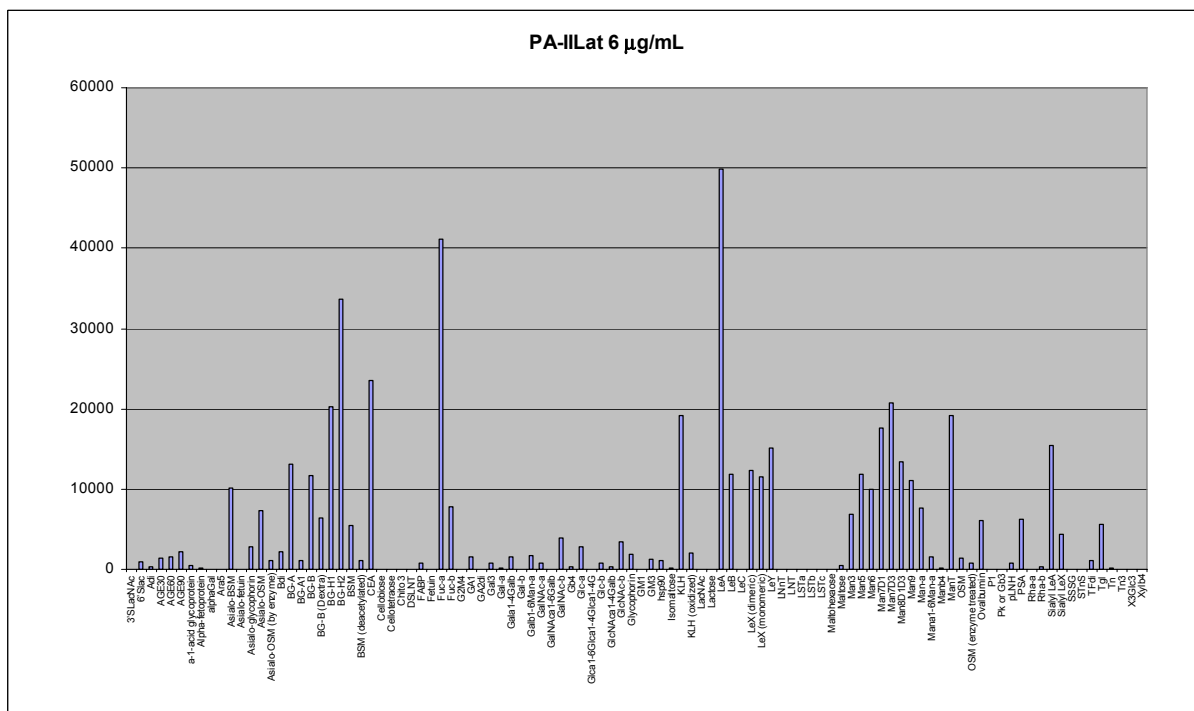



E.

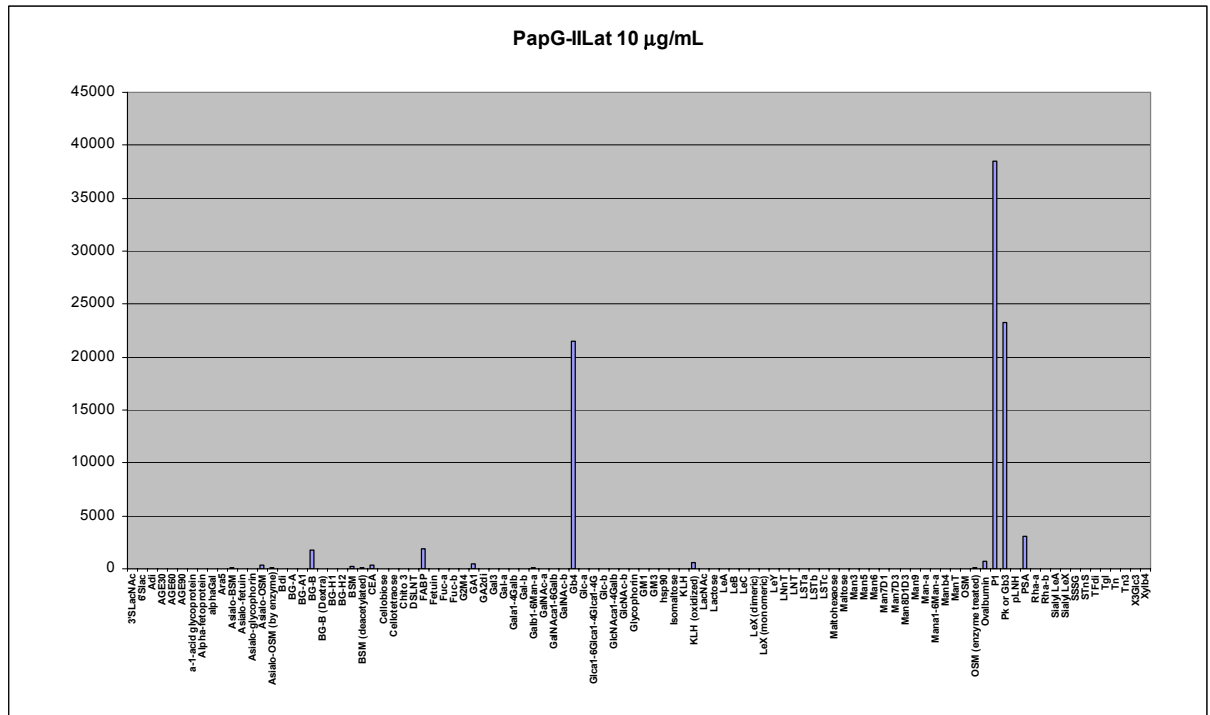

F.

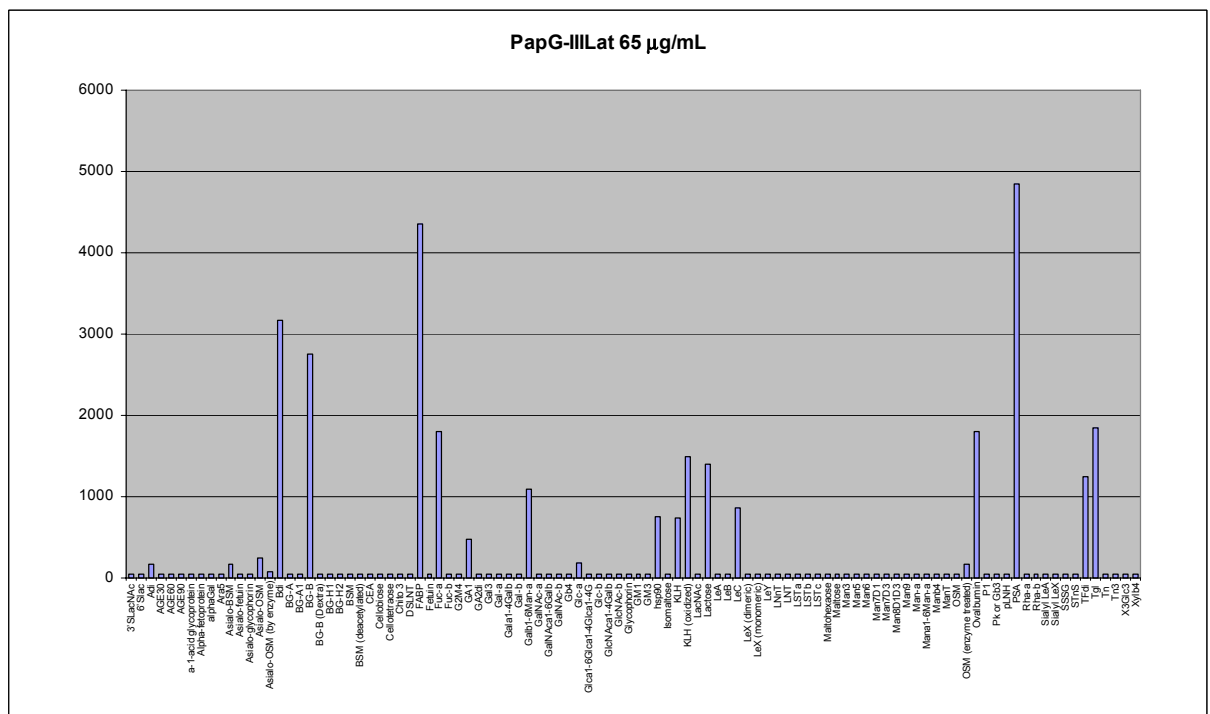

G.

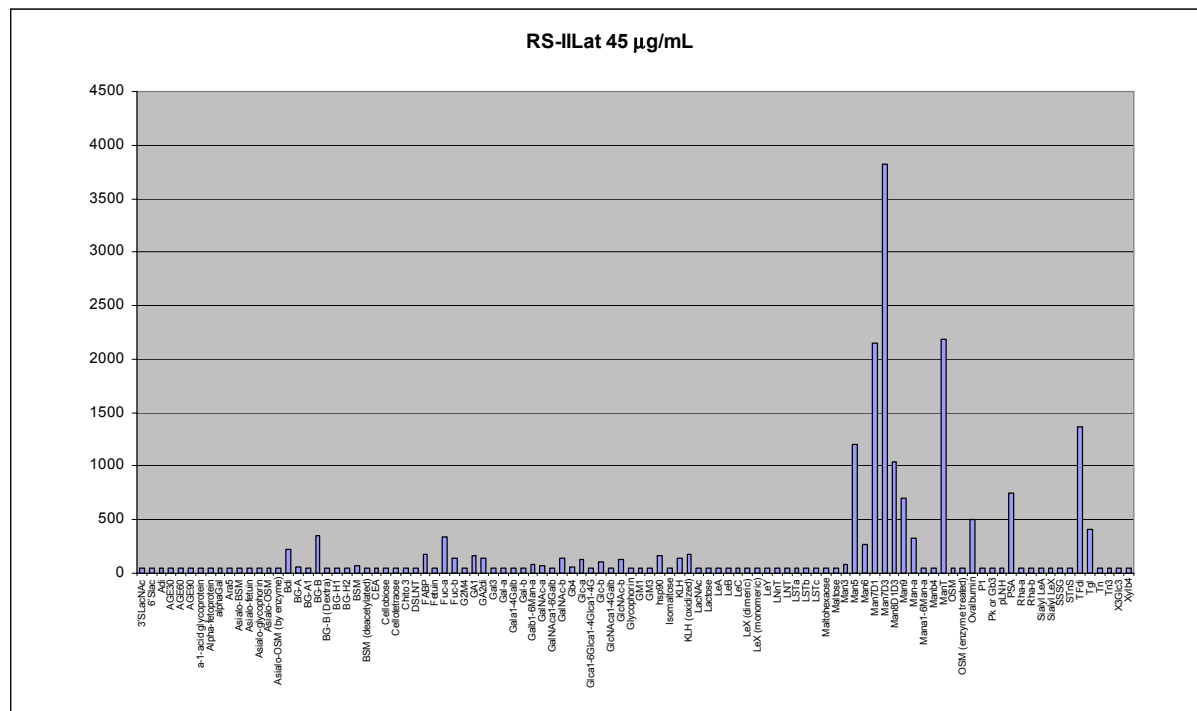

**Figure S2** Bar Graphs of the Carbohydrate Microarray Data Displayed in Figure 3. Lectin binding was detected by incubation with mouse anti-His5 antibody followed by Cy3-labeled goat anti-mouse antibody. For each graph, the y-axis is background corrected median fluorescence intensities and the x-axis contains individual array components. Lectins evaluated are as follows: A. GafD, B. GafD-m, C. PA-IL, D. PA-IIL, E. PapGII, F. PapGIII, G. RS-III.

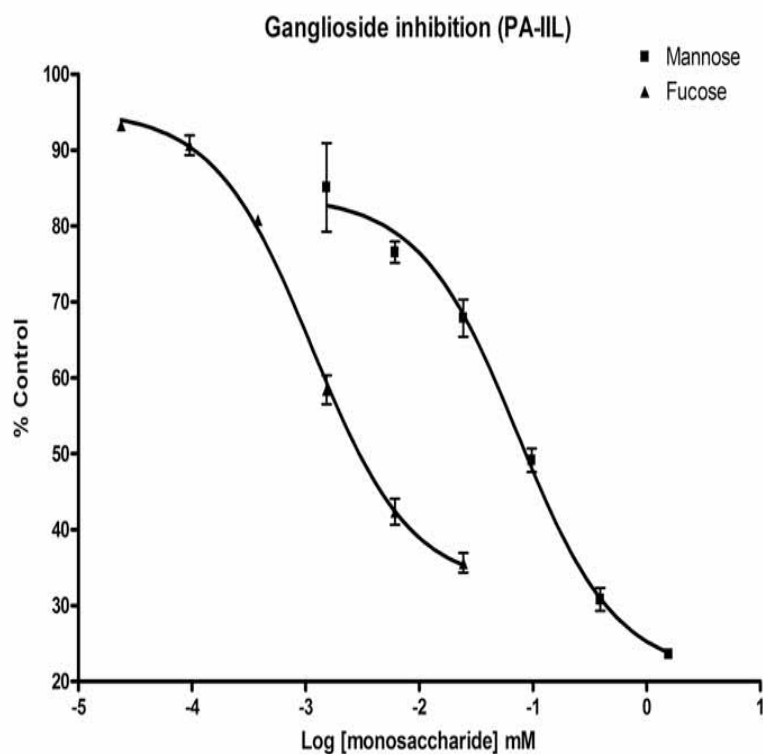

**Figure S3** *Inhibition of PA-IIL Binding to Gangliosides by ELISA Assay.* ELISA was run as described in *Experimental* with the following modification, varying concentrations of monosaccharide were incubated with PA-IIL (500 ng) prior to addition to the ELISA assay.  $IC_{50}$  values were calculated using non-linear regression analysis.

**A.**

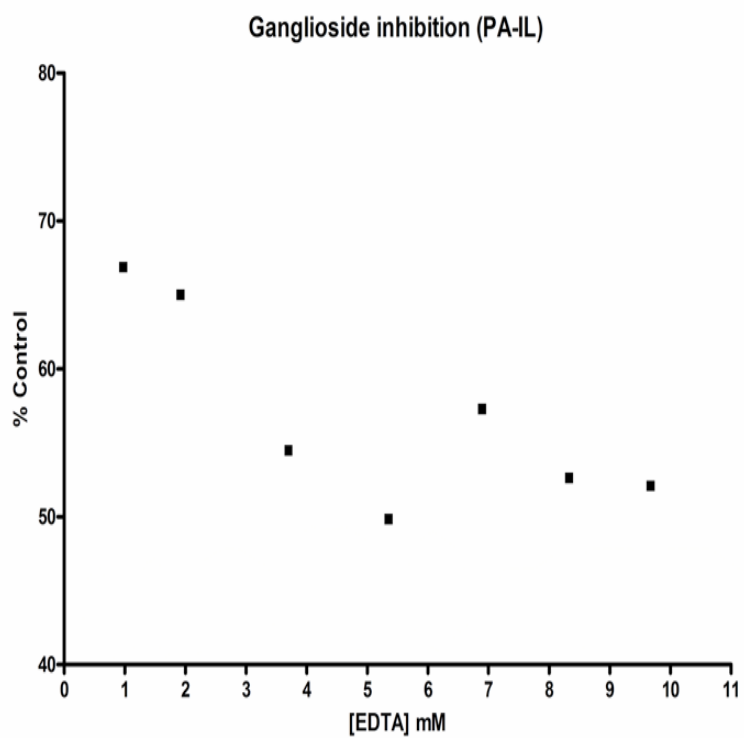

**B.**

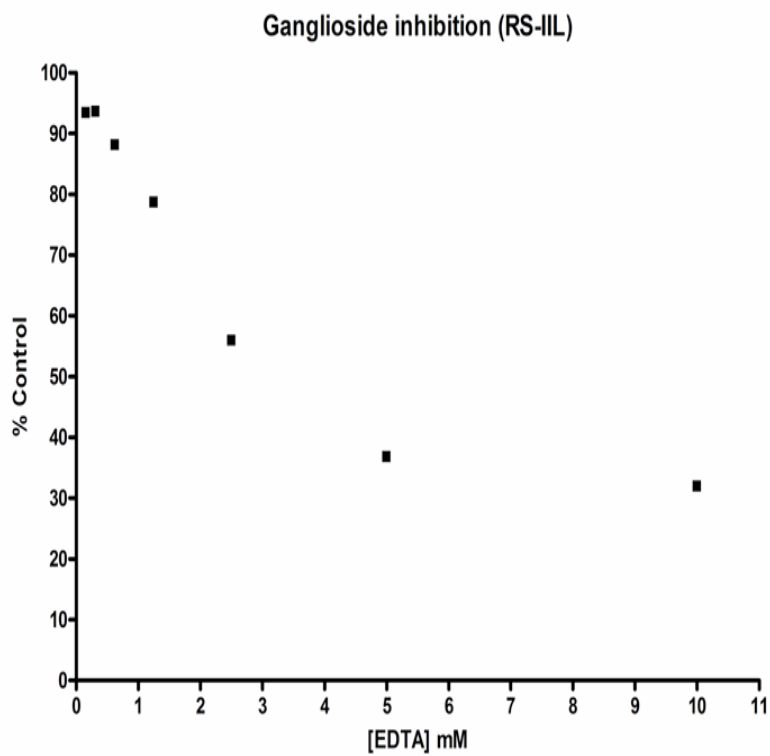

**Figure S4** *Inhibition of PA-IL and RS-III Binding to Gangliosides by ELISA Assay.* ELISA was run as described in *Experimental* with the following modification, varying concentrations of EDTA were incubated with lectins (500 ng) prior to addition to the ELISA assay.

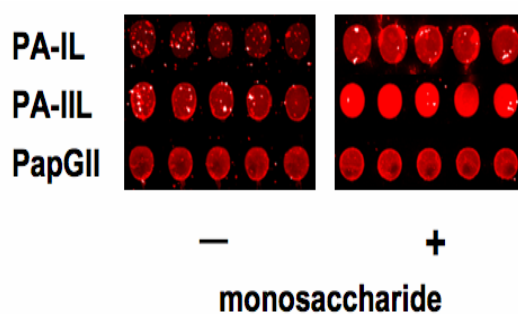

**Figure S5** *Spot Morphology and Lectin Activity are Improved by the Addition of Monosaccharides.* Lectins are printed as described in *Experimental* and probed with Cy5-Porcine Mucin (10  $\mu$ g).

(a)

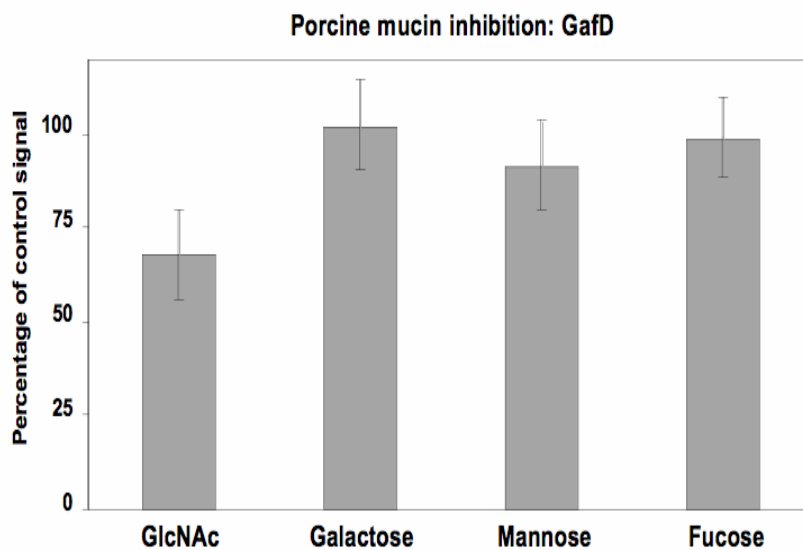

(b)

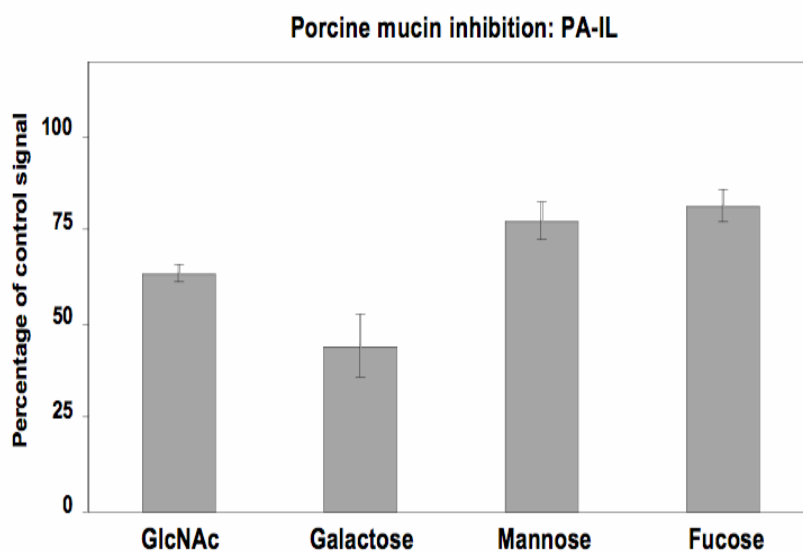

(c)

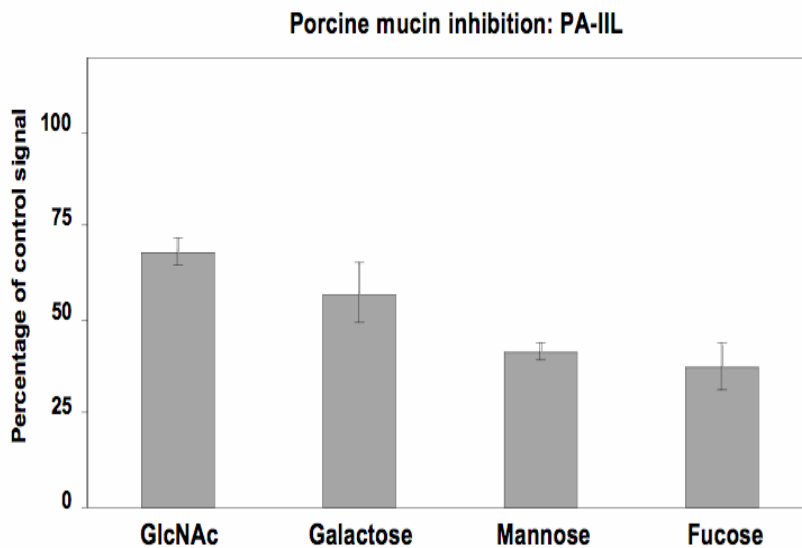

(d)

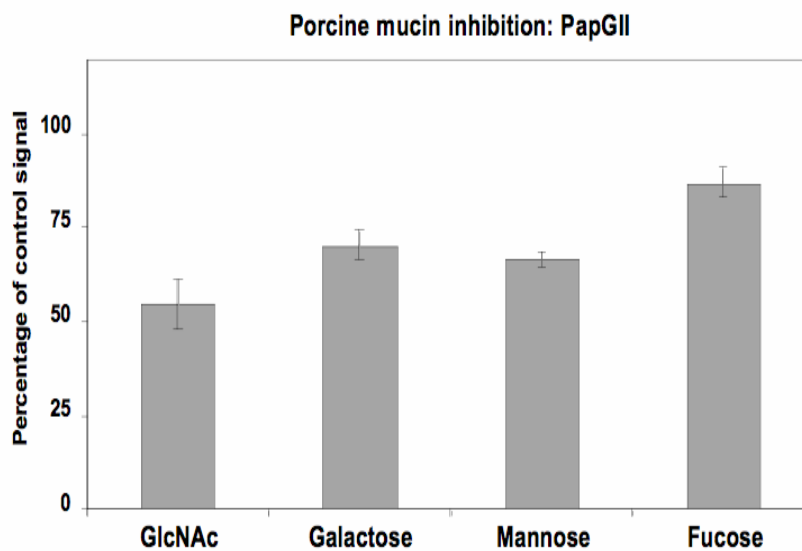

**Figure S6** *Inhibition of Porcine Mucin Signal by Monosaccharides.* Arrays were hybridized with 100 mM of indicated monosaccharide inhibitor for 30 min prior to addition of 10  $\mu$ g of Cy5-labeled Porcine Mucin. Inhibition data is shown for: (a) GafD, (b) PA-IL, (c) PA-IIL and (d) PapGII.

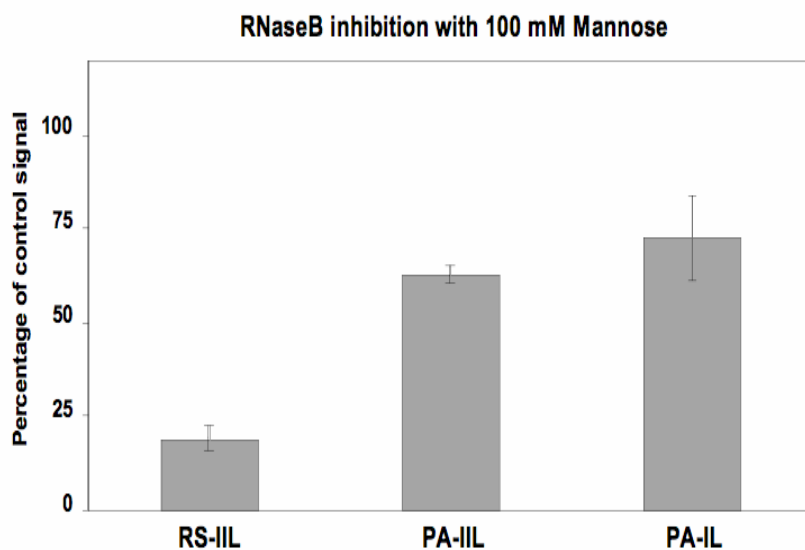

**Figure S7** *Inhibition of RNaseB Signal by Mannose.* Arrays were hybridized with 100 mM of mannose for 30 min prior to addition of 10  $\mu$ g of Cy5-labeled RNaseB.



(a)

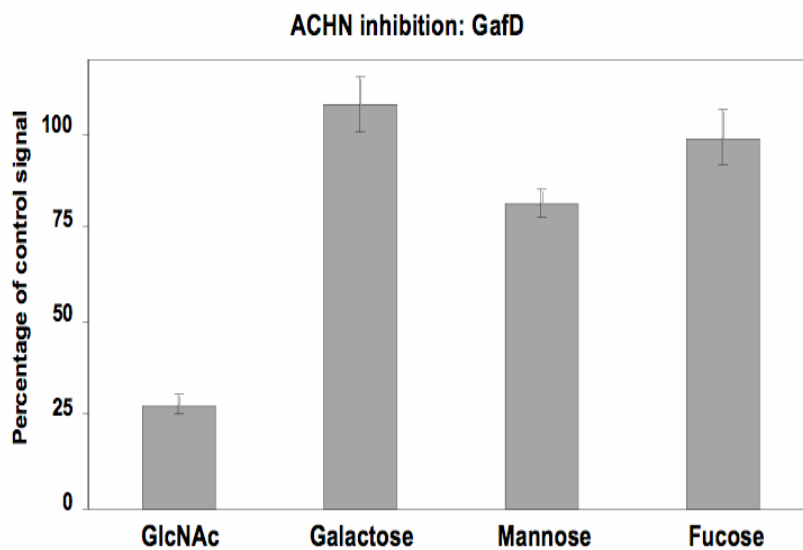

(b)

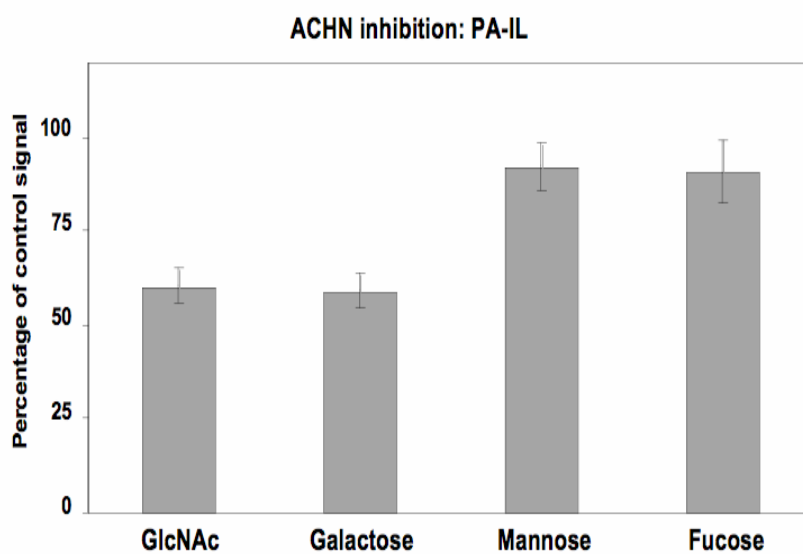

(c)

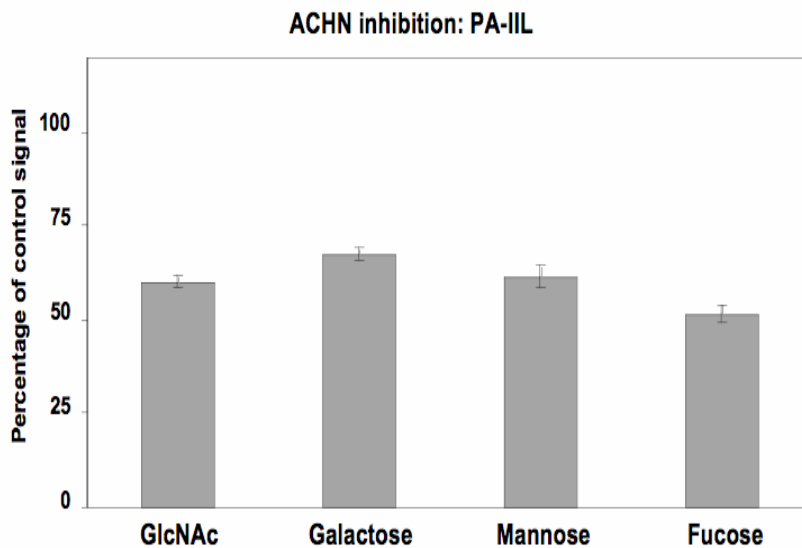

**Figure S8** *Inhibition of ACHN Cell Derived Signal by Monosaccharides.* Arrays were hybridized with 100 mM of indicated monosaccharide inhibitor for 30 min prior to addition of 10  $\mu$ g of Cy5-labeled cellular micellae derived from the ACHN cell line. Inhibition data is shown for: (a) GafD, (b) PA-IL and (c) PA-IIL.
